# Supplementary material for: Correlation Between the Visual Prostate Symptom Score and International Prostate Symptom Score in Patients With Lower Urinary Tract Symptoms
Source: PubMed Central journal article supplement — Int Neurourol J. 2014 Mar 31;18(1):37–41. doi: 10.5213/inj.2014.18.1.37 (PMC3983508; doi:10.5213/inj.2014.18.1.37), 2014-03-31
Supplement: inj-18-37-s001.pdf [file inj-18-37-s001.pdf]

**Supplementary Materials.** Visual Prostate Symptom Score

**Question 1**

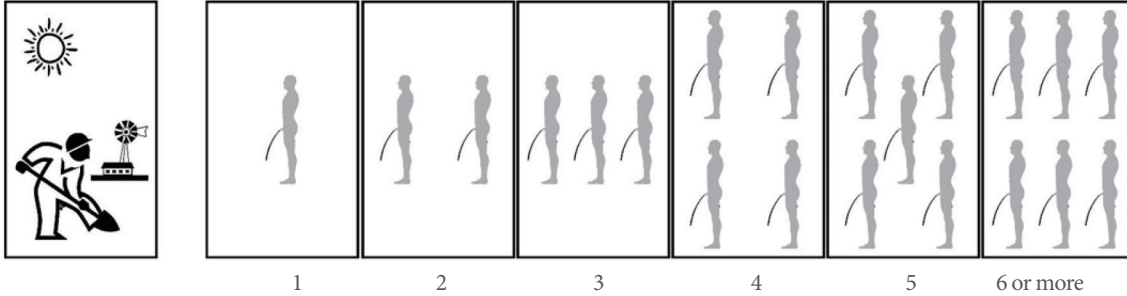

**Question 2**

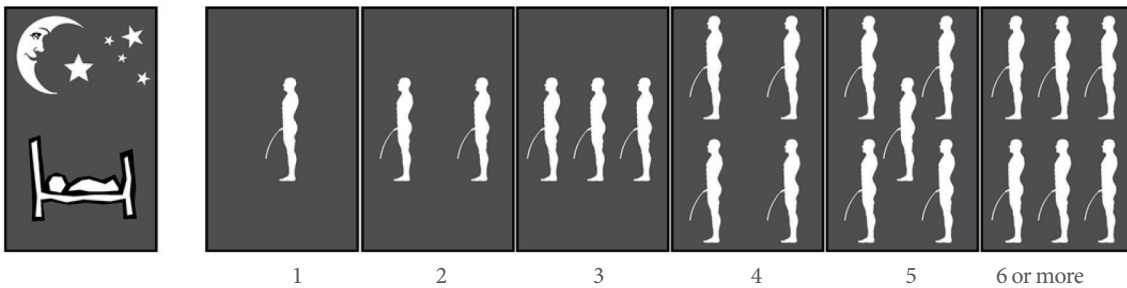

**Question 3**

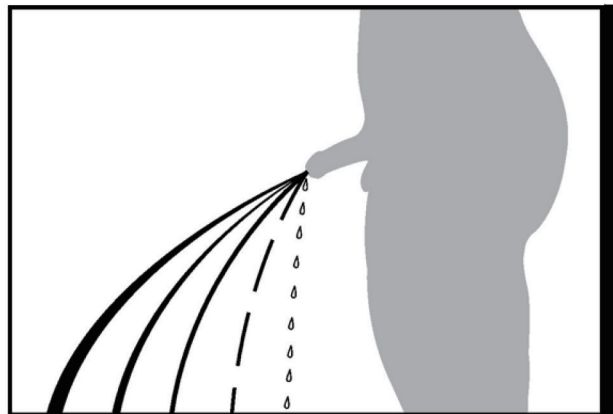

**Question 4**

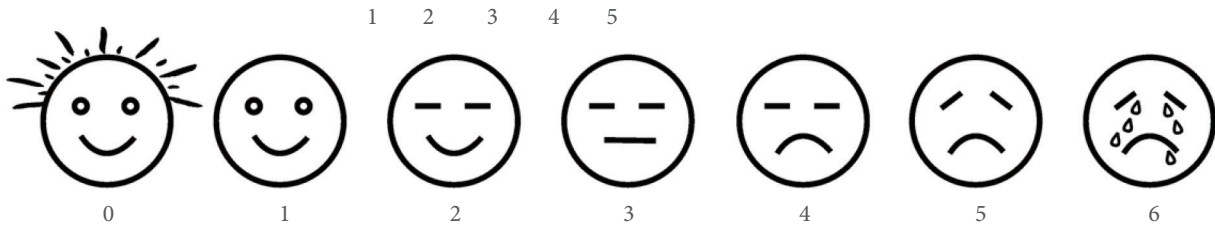

Visual Prostate Symptom Score pictograms in which the patient indicates his urinary frequency during the day (question 1) and night (question 2), his assessment of the force of his urinary stream (question 3), and his feelings about his bladder symptoms (quality of life question). Reprinted with permission of Professor Chris F. Heyns, Department of Urology, Stellenbosch University, Cape Town, South Africa.
